# Supplementary material for: Facilitators and barriers to clinical practice guideline-consistent supportive care at pediatric oncology institutions: a Children’s Oncology Group study
Source: PubMed Central journal article supplement (PMC8447588; doi:10.1186/s43058-021-00200-2), 2021-09-16
Supplement: 43058_2021_200_MOESM2_ESM.pdf [file 43058_2021_200_MOESM2_ESM.pdf]

Additional file 2: Characteristics of institutions that did and did not contribute focus group participants

| Characteristic                              | Participating Institutions<br>(n=18) | Non-participating Institutions<br>(n=8) | p value |
|---------------------------------------------|--------------------------------------|-----------------------------------------|---------|
| Site Location, n (%)                        |                                      |                                         |         |
| Western US                                  | 1 (6)                                | 2(25)                                   | 0.046   |
| Southwestern US                             | 5 (28)                               | 0                                       |         |
| Northeastern US                             | 1 (6)                                | 0                                       |         |
| Southeastern US                             | 6 (33)                               | 6 (75)                                  |         |
| Midwestern US                               | 5 (28)                               | 0                                       |         |
| Site Type, n (%)                            |                                      |                                         |         |
| Minority/Underserved Community* (vs. Other) | 9 (50)                               | 2 (25)                                  | 0.39    |
| Pediatric (vs. Mixed Adult and Pediatric)   | 11 (61)                              | 6 (75)                                  | 0.67    |
| Private (vs. Academic)                      | 12 (67)                              | 7 (88)                                  | 0.37    |

n: number

\* Serve a population composed of at least 30% racial or ethnic minorities or rural patients.
