# Supplementary material for: Facilitators and barriers to clinical practice guideline-consistent supportive care at pediatric oncology institutions: a Children’s Oncology Group study
Source: PubMed Central journal article supplement (PMC8447588; doi:10.1186/s43058-021-00200-2), 2021-09-16
Supplement: 43058_2021_200_MOESM3_ESM.pdf [file 43058_2021_200_MOESM3_ESM.pdf]

Additional file 3: Facilitators and barriers to clinical practice guideline implementation: Top five prioritized themes within each focus group and across all focus groups. Only physicians participated in Focus Group (FG) 3 while only non-physicians participated in FG 2. FG 1 and 4 to 7 were mixed.

| Theme                                         | FG1 | FG2 | FG3 | FG4 | FG5 | FG6 | FG7 | Total Score |
|-----------------------------------------------|-----|-----|-----|-----|-----|-----|-----|-------------|
| <b>Facilitators</b>                           |     |     |     |     |     |     |     |             |
| Implementation: Facilitators - System         | 40  | 10  | 17  | 14  | 33  | 17  |     | 131         |
| Implementation: Facilitators - Organizational | 33  | 38  | 16  | 41  | 54  | 84  | 42  | 308         |
| Facilitators – Individual                     | 31  | 26  | 26  | 11  | 40  | 84  | 40  | 258         |
| Implementation: Strategies                    | 15  |     | 32  |     |     |     | 19  | 66          |
| Accommodation: User needs/values              | 14  |     | 6   | 38  | 11  | 51  | 22  | 142         |
| Implementation: Tools                         |     | 16  |     |     |     | 18  | 19  |             |
| Validity: Evidence Graded                     |     | 10  |     |     |     |     |     |             |
| Accommodation: Human Resources                |     |     |     |     | 21  |     |     |             |
| Accommodation: Professional                   |     |     |     | 14  |     |     |     |             |
| <b>Barriers</b>                               |     |     |     |     |     |     |     |             |
| Implementation: Barriers - Organizational     | 36  | 25  | 30  | 25  | 46  | 76  | 32  | 270         |
| Implementation: Barriers – Individual         | 24  | 30  | 43  | 26  | 13  | 45  | 38  | 219         |
| Accommodation: Professional                   | 17  |     |     |     | 13  |     | 16  | 46          |
| Implementation: Barriers - System             | 14  | 24  | 22  | 16  | 26  | 34  | 18  | 154         |
| Accommodation: User needs/values              | 10  | 8   | 13  | 18  | 31  | 29  |     | 109         |

Sugalski AJ et al. Facilitators and barriers to clinical practice guideline-consistent supportive care at pediatric oncology institutions: A Children’s Oncology Group study. Implement Sci Commun 2021

|                                  |  |   |    |    |    |    |    |  |
|----------------------------------|--|---|----|----|----|----|----|--|
| Accommodation: Costs             |  | 9 |    |    |    |    |    |  |
| Applicability: Individualization |  |   | 13 |    |    |    |    |  |
| Validity: Evidence Graded        |  |   |    | 21 |    |    |    |  |
| Accommodation: Human Resources   |  |   |    |    | 14 |    |    |  |
| Accommodation: Objective         |  |   |    |    |    | 22 |    |  |
| Implementation: Tools            |  |   |    |    |    |    | 19 |  |
