# Supplementary material for: Facilitators and barriers to clinical practice guideline-consistent supportive care at pediatric oncology institutions: a Children’s Oncology Group study
Source: PubMed Central journal article supplement (PMC8447588; doi:10.1186/s43058-021-00200-2), 2021-09-16
Supplement: 43058_2021_200_MOESM4_ESM.pdf [file 43058_2021_200_MOESM4_ESM.pdf]

Additional file 4: Clinical practice guideline implementation steps identified by each focus group in Part 2. Only physicians participated in Focus Group (FG) 3 while only non-physicians participated in FG 2. FG 1 and 4 to 7 were mixed.

| Step | Topic and Focus Group (FG) Number                            |                                                                                                                     |                                                |                                                             |                                                                       |                                                                              |                                                                                                                  |
|------|--------------------------------------------------------------|---------------------------------------------------------------------------------------------------------------------|------------------------------------------------|-------------------------------------------------------------|-----------------------------------------------------------------------|------------------------------------------------------------------------------|------------------------------------------------------------------------------------------------------------------|
|      | CINV                                                         | Fever and Neutropenia                                                                                               |                                                |                                                             | Fertility Preservation                                                |                                                                              |                                                                                                                  |
|      | FG3                                                          | FG1                                                                                                                 | FG5                                            | FG2                                                         | FG4                                                                   | FG6                                                                          | FG7                                                                                                              |
| 1    | Education: (why) Practitioners, Pharmacists, Nursing, Buy-in | Everyone looking at the same data                                                                                   | Create small focus group - multi-disciplinary  | Identifying AYA champion                                    | Provider willingness and initiation to have conversation              | Naming an institutional champion                                             | Develop committee for CPG review/local adaptation                                                                |
| 2    | Defining moderately emetogenic                               | Tumor board (or equivalent) incorporate CPG into pre-printed order set if necessary                                 | Review all evidence-based practices            | Developing team: physicians, social worker, NP's Psychology | Identify resources needed - establish banking facility                | Create task force/identify team members to have discussion with all patients | Evaluate funding/ resource availability                                                                          |
| 3    | Ensure drug availability                                     | Education (RN's, residents, families)                                                                               | Define 'afebrile'. Define bone marrow recovery | Identifying a facility for sperm banking                    | Define patient population needing conversation and provider education | Include patient and/or family rep in planning/implementation                 | Designated champion to oversee implementation of process / Include APRN in initial diagnosis discussion for AYAs |
| 4    | Compatibility of drugs                                       | RN's know exact time (Develop tools to allow RN's to track, Hard stop in EMR, Handoff - RN or Resident, Visual Cue) | Present information to stakeholders            | Identifying funding                                         | Procedure for collection                                              | Finding FP Specialist                                                        | Develop standard process plan/logistics (labs, kits, samples pick up, etc. location, wifi / materials            |

| Step | Topic and Focus Group (FG) Number                                             |                                                                                                                                           |                                               |                                                                     |                                                                                                                       |                                                                    |                                                             |
|------|-------------------------------------------------------------------------------|-------------------------------------------------------------------------------------------------------------------------------------------|-----------------------------------------------|---------------------------------------------------------------------|-----------------------------------------------------------------------------------------------------------------------|--------------------------------------------------------------------|-------------------------------------------------------------|
|      | CINV                                                                          | Fever and Neutropenia                                                                                                                     |                                               |                                                                     | Fertility Preservation                                                                                                |                                                                    |                                                             |
|      | FG3                                                                           | FG1                                                                                                                                       | FG5                                           | FG2                                                                 | FG4                                                                                                                   | FG6                                                                | FG7                                                         |
| 5    | EMR template (CPOE, Insurance, Alternatives, Exceptions)                      | Creating guidelines for RN's (Checking results and communication - action items for RNs)                                                  | Seek approval from institutional safety board | Education: team, family, patient                                    | Standardized Protocol Initiated - power plan for new dx -> order set EHR -> prompt in any appropriate chemo order set | Finding out cost - Family, institution                             | Designate team (MD/RN/SW) to provide info to patient/family |
| 6    | Patient/Family education (continuing education of users)                      | Multidisciplinary Rounds (MD-led education, with required attendance, empowering families, incorporating guideline into script at rounds) |                                               | Integration into care/treatment process (including logistical info) | Patient education materials - standardized packet                                                                     | Create supportive docs (posters, pamphlets) for staff and families | Cultural/Patient sensitivity including privacy              |
| 7    | Monitoring for compliance (Pharmacy audit, EMR query, Re-evaluating fallouts) | Auditing to determine adherence (Managing non-compliers, chart requires)                                                                  |                                               | Provision of emotional support                                      | CPG Implementation audit process - feedback                                                                           | Create step-by-step algorithm to provide care/FP                   |                                                             |
| 8    |                                                                               |                                                                                                                                           |                                               |                                                                     |                                                                                                                       | Include prompt/link to EMR/include in standard order set           |                                                             |
| 9    |                                                                               |                                                                                                                                           |                                               |                                                                     |                                                                                                                       | Staff education                                                    |                                                             |

FG: focus group; CINV: chemotherapy-induced nausea and vomiting
